# Supplementary material for: Impact of bronchiectasis on susceptibility to and severity of COVID-19: a nationwide cohort study
Source: PubMed Central journal article supplement — Ther Adv Respir Dis. 2021 Feb 14;15:1753466621995043. doi: 10.1177/1753466621995043 (PMC7890711; doi:10.1177/1753466621995043), 2021-02-14
Supplement: sj-pdf-2-tar-10.1177_1753466621995043.pdf [file sj-pdf-2-tar-10.1177_1753466621995043.pdf]

Reviewer 1 v.1

Comments to the Author

This is an excellent work. This report will be important for clinicians.

I have only one question.

Do the authors have any data about the differences of duration of COVID-19 illness between patients with and without BE?
