# Supplementary material for: Impact of bronchiectasis on susceptibility to and severity of COVID-19: a nationwide cohort study
Source: PubMed Central journal article supplement — Ther Adv Respir Dis. 2021 Feb 14;15:1753466621995043. doi: 10.1177/1753466621995043 (PMC7890711; doi:10.1177/1753466621995043), 2021-02-14
Supplement: sj-pdf-4-tar-10.1177_1753466621995043.pdf [file sj-pdf-4-tar-10.1177_1753466621995043.pdf]

Reviewer 2 v.2

Comments to the Author

I am happy now for this paper the go-ahead for publication. There are some shortcomings that cannot be answered as the patients are far removed from the investigators. However, at the end of the day the patients had bronchiectasis and did worse with COVID -19. I would , however, like the investigators to do the following. 15% of high-resolution CT scans are erroneously read as bronchiectasis by non-experts in thin section CT scan. It is almost standard in bronchiectasis studies that all the scans or a significant proportion of them are re-read by respiratory expert in thin section CT scan to ensure that the patient does indeed have bronchiectasis
